# Supplementary material for: Fine tuning through valence bond tautomerization of ancillary ligands in ruthenium(ii) arene complexes for better anticancer activity and enzyme inhibition properties
Source: Royal Society of Chemistry journal article supplement (doi:10.1039/c6dt02969h), 2016-01-01
Supplement: c6dt02969h1.pdf [file c6dt02969h1.pdf]

Supporting Information for

**Fine tuning through valence bond tautomerization of ancillary ligand in ruthenium(II) arene complex for better anticancer activity and enzyme inhibition property**

Poulami Mandal,<sup>a</sup> Novina Malviya,<sup>a</sup> M. Fátima C. Guedes da Silva,<sup>b</sup> Sandeep Singh Dhankhar,<sup>c</sup> C. M. Nagaraja,<sup>c</sup> Shaikh M Mobin,<sup>a,d</sup> Suman Mukhopadhyay<sup>\*, a,d</sup>

<sup>a</sup> *Department of Chemistry, School of Basic Sciences, Indian Institute of Technology Indore, Indore 453552, India.*

<sup>b</sup> *Centro de Química Estrutural, Complexo I, Instituto Superior Técnico, Technical University of Lisbon, Avenida Rovisco Pais, 1049-001, Lisbon, Portugal*

<sup>c</sup> *Department of Chemistry, Indian Institute of Technology Ropar, Rupnagar 140001, Punjab, India*

<sup>d</sup> *Centre for Bioscience and Biomedical Engineering (BSBE), Indian Institute of Technology Indore, Indore 453552, India.*

Tel : +91 731 2438 705 Fax: +91 731 2361 482 E-mail: [suman@iiti.ac.in](mailto:suman@iiti.ac.in)

Table of Contents

|                                                       |    |
|-------------------------------------------------------|----|
| <sup>1</sup> H NMR spectra of Complex <b>2</b> .....  | S1 |
| <sup>13</sup> NMR spectra of Complex <b>2</b> .....   | S2 |
| <sup>31</sup> P NMR spectra of Complex <b>2</b> ..... | S3 |
| ESI- Mass spectrum of Complex <b>2</b> .....          | S4 |
| <sup>1</sup> H NMR spectra of Complex <b>4</b> .....  | S5 |

|                                                       |            |
|-------------------------------------------------------|------------|
| <sup>13</sup> NMR spectra of Complex <b>4</b> .....   | <b>S6</b>  |
| <sup>31</sup> P NMR spectra of Complex <b>4</b> ..... | <b>S7</b>  |
| ESI- Mass spectrum of Complex <b>4</b> .....          | <b>S8</b>  |
| <sup>1</sup> H NMR spectra of Complex <b>5</b> .....  | <b>S9</b>  |
| ESI- Mass spectrum of Complex <b>5</b> .....          | <b>S10</b> |
| <sup>1</sup> H NMR spectra of Complex <b>6</b> .....  | <b>S11</b> |
| <sup>13</sup> NMR spectra of Complex <b>6</b> .....   | <b>S12</b> |
| <sup>31</sup> P NMR spectra of Complex <b>6</b> ..... | <b>S13</b> |
| ESI- Mass spectrum of Complex <b>6</b> .....          | <b>S14</b> |
| <sup>1</sup> H NMR spectra of Complex <b>7</b> .....  | <b>S15</b> |
| ESI- Mass spectrum of Complex <b>7</b> .....          | <b>S16</b> |
| <sup>1</sup> H NMR spectra of Complex <b>8</b> .....  | <b>S17</b> |
| <sup>13</sup> NMR spectra of Complex <b>8</b> .....   | <b>S18</b> |
| <sup>31</sup> P NMR spectra of Complex <b>8</b> ..... | <b>S19</b> |
| ESI- Mass spectrum of Complex <b>8</b> .....          | <b>S20</b> |

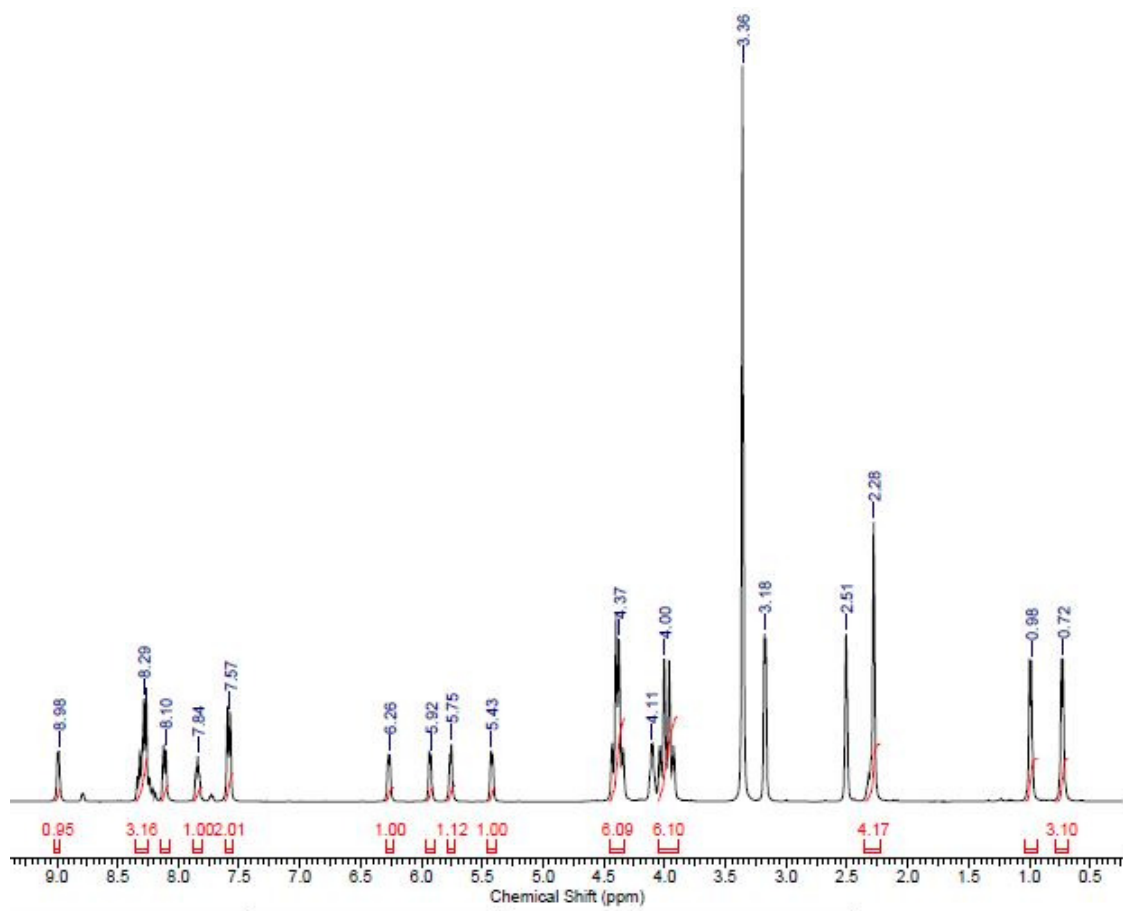

Fig S1:  $^1\text{H}$  NMR Spectra of Complex 2

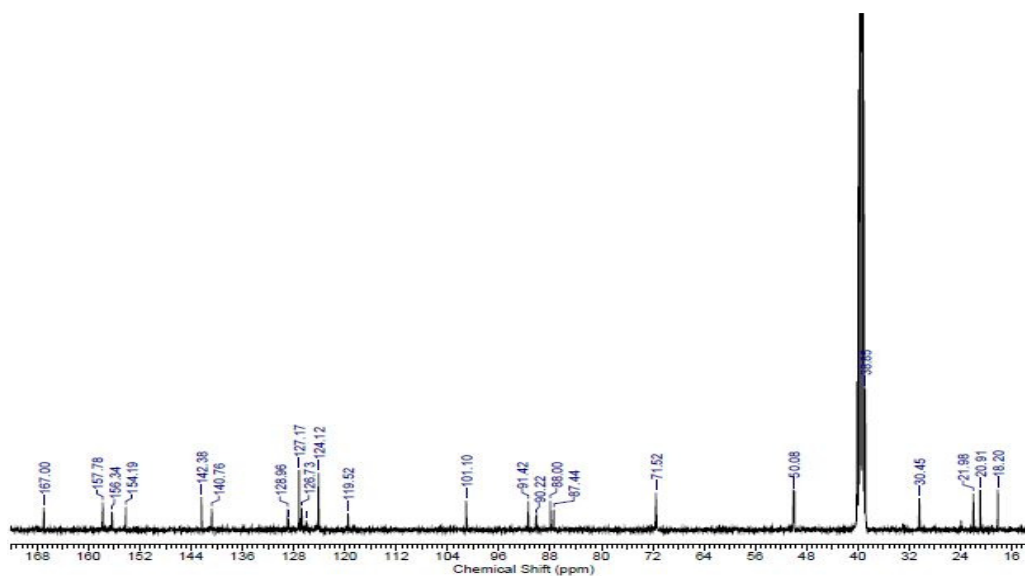

Fig S2:  $^{13}\text{C}$  NMR Spectra of Complex 2

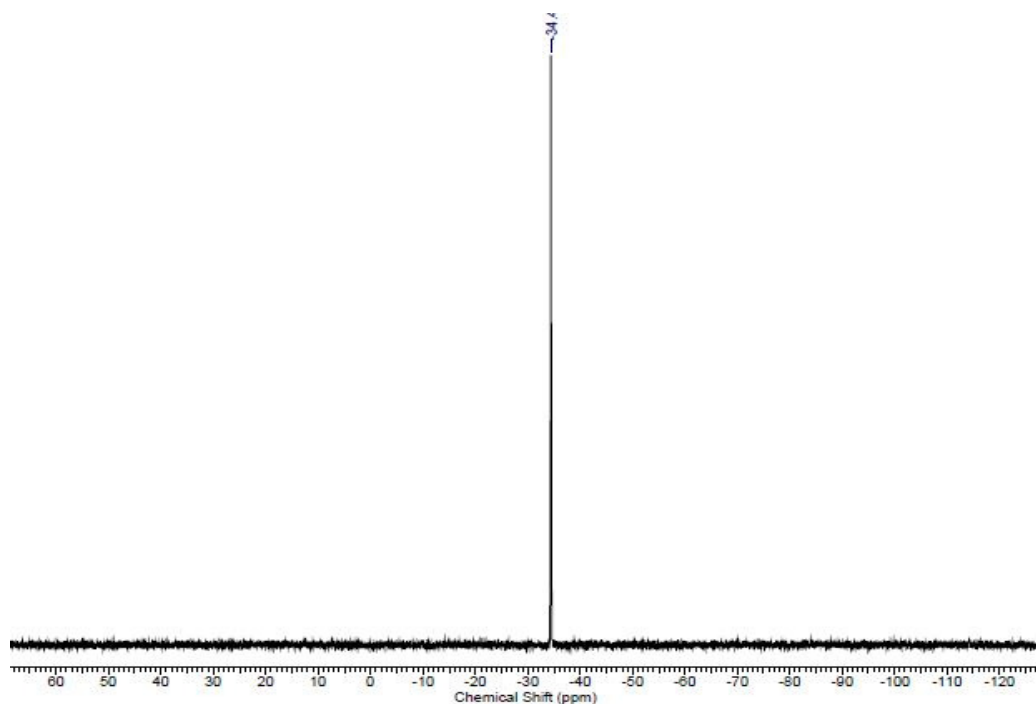

Fig S3:  $^{31}\text{P}$  NMR Spectra of Complex **2**

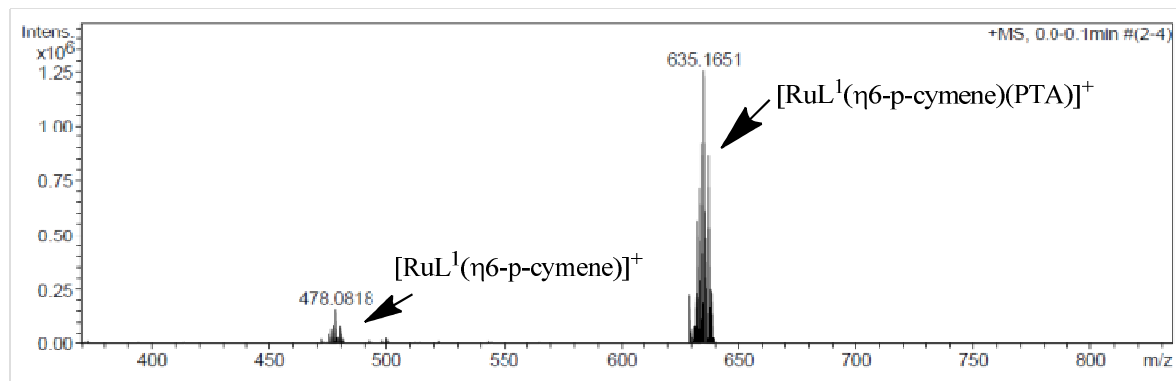

Fig S4: ESI-MS Spectra of Complex **2**  $[\text{RuL}^1(\eta^6\text{-p-cymene})(\text{PTA})]^+$

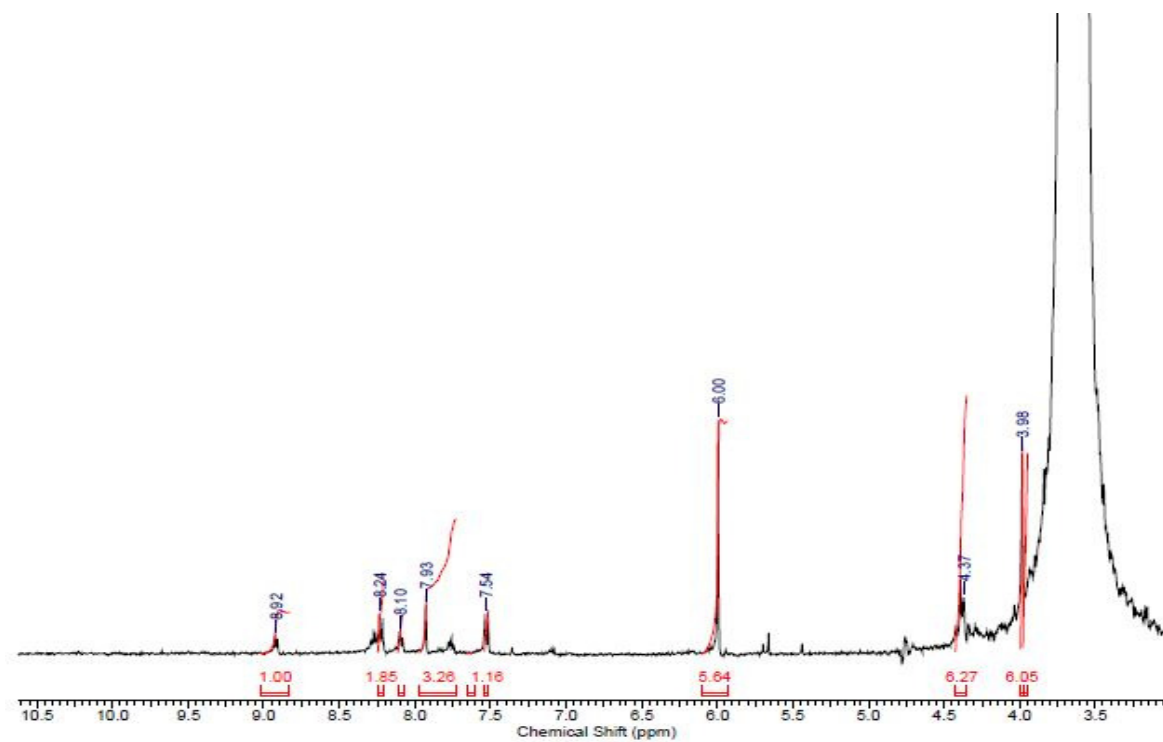

Fig S5:  $^1\text{H}$  NMR Spectra of Complex 4

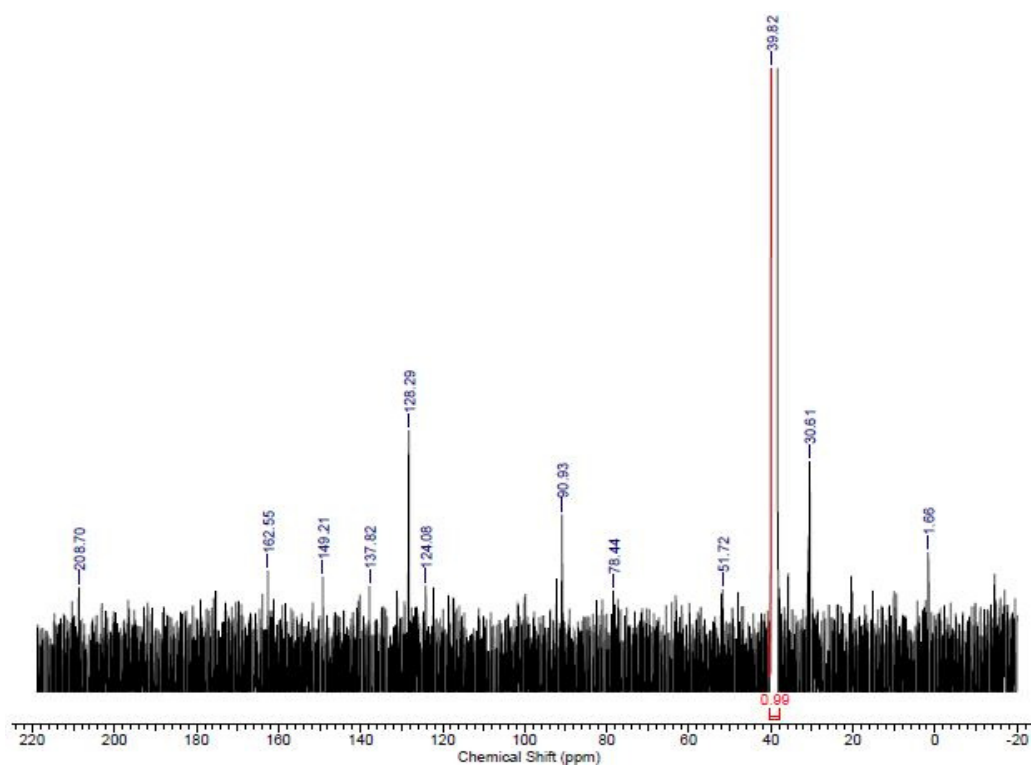

Fig S6:  $^{13}\text{C}$  NMR Spectra of Complex 4

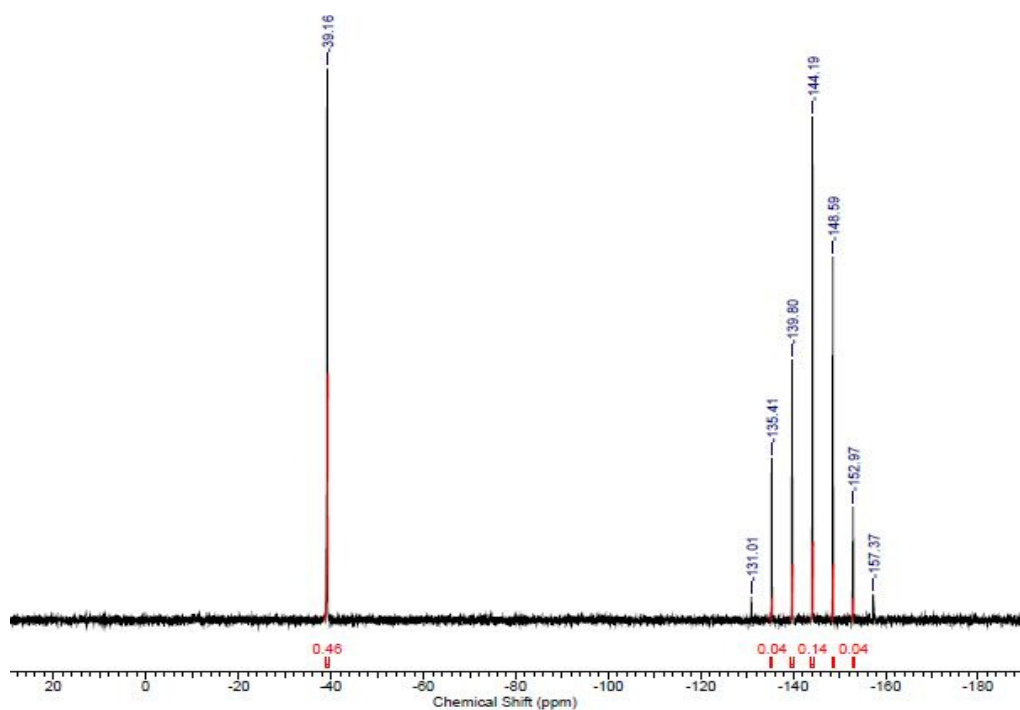

Fig S7:  $^{31}\text{P}$  NMR of Complex 4

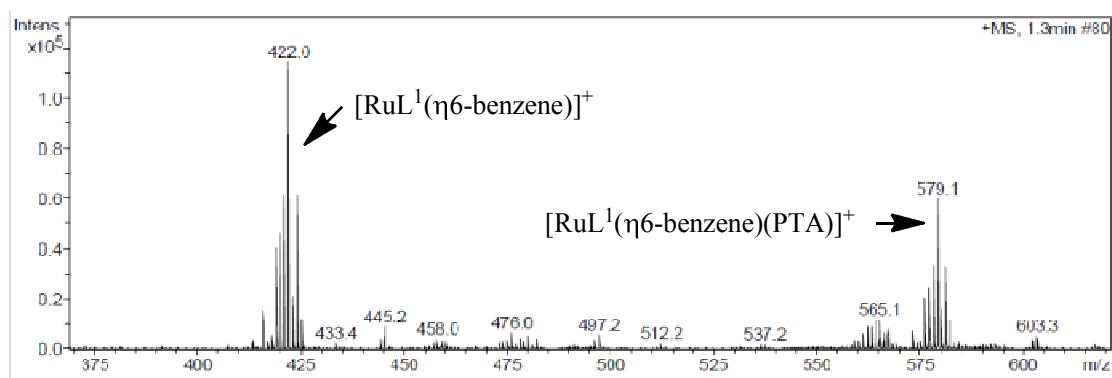

Fig S8: ESI-MS Spectra of Complex 4  $[\text{RuL}^1(\eta^6\text{-benzene})(\text{PTA})]^+$

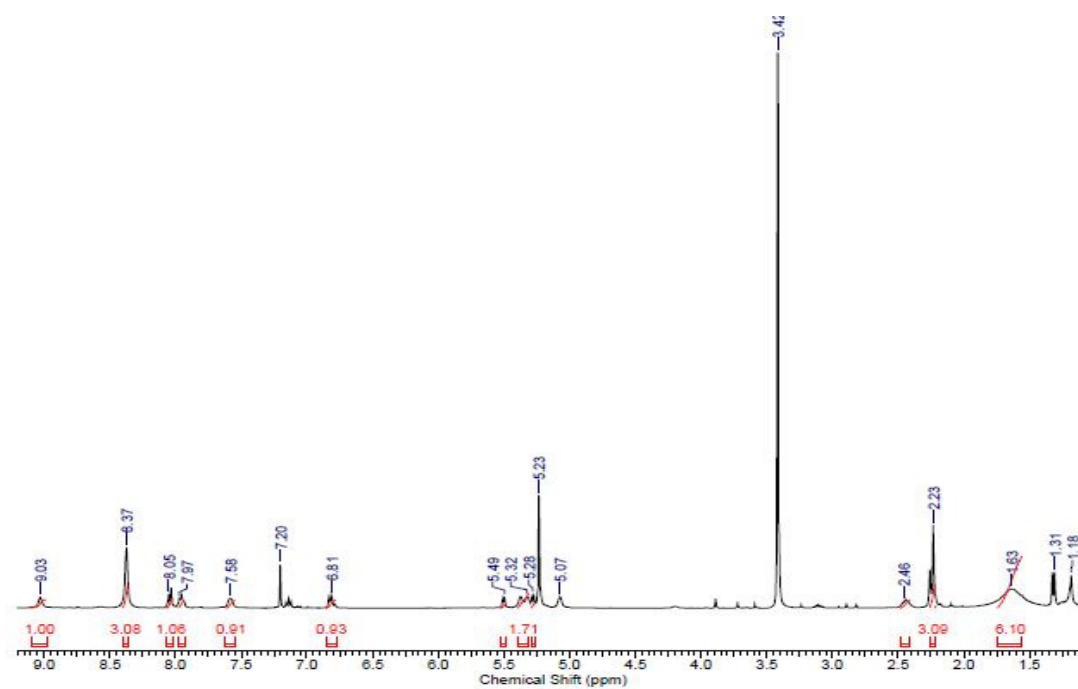

Fig S9:  $^1\text{H}$  NMR of Complex **5**

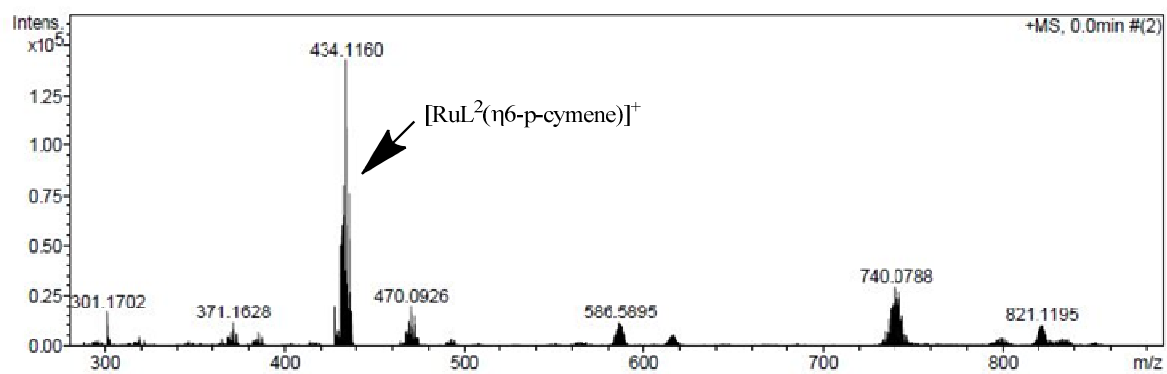

Fig S10: ESI-MS Spectra of Complex **5**  $[\text{RuL}^2(\eta^6\text{-p-cymene})]^+$

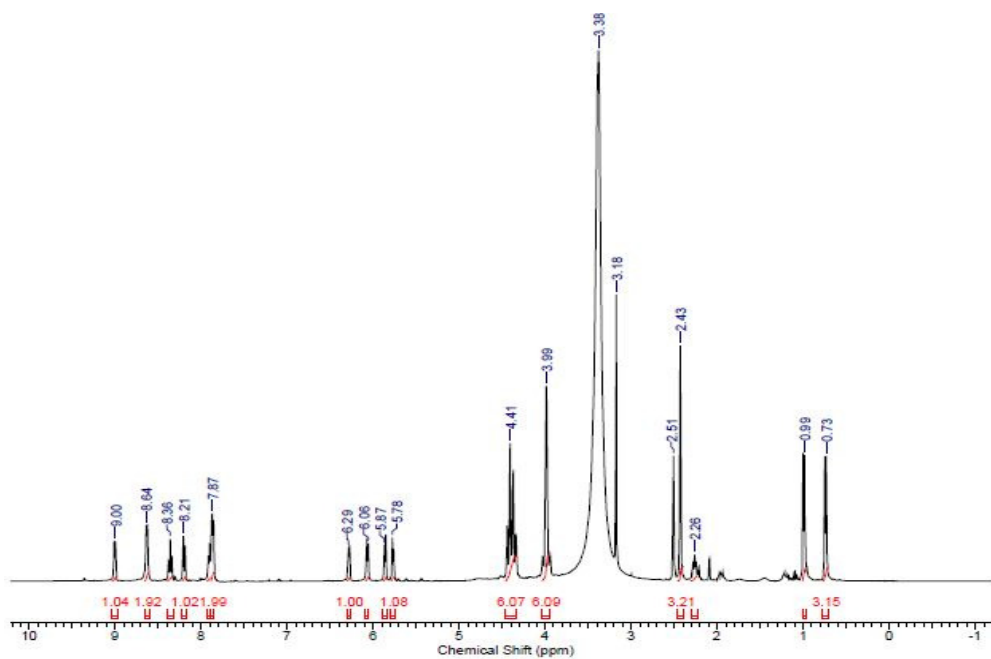

Fig S11:  $^1\text{H}$  NMR of Complex 6

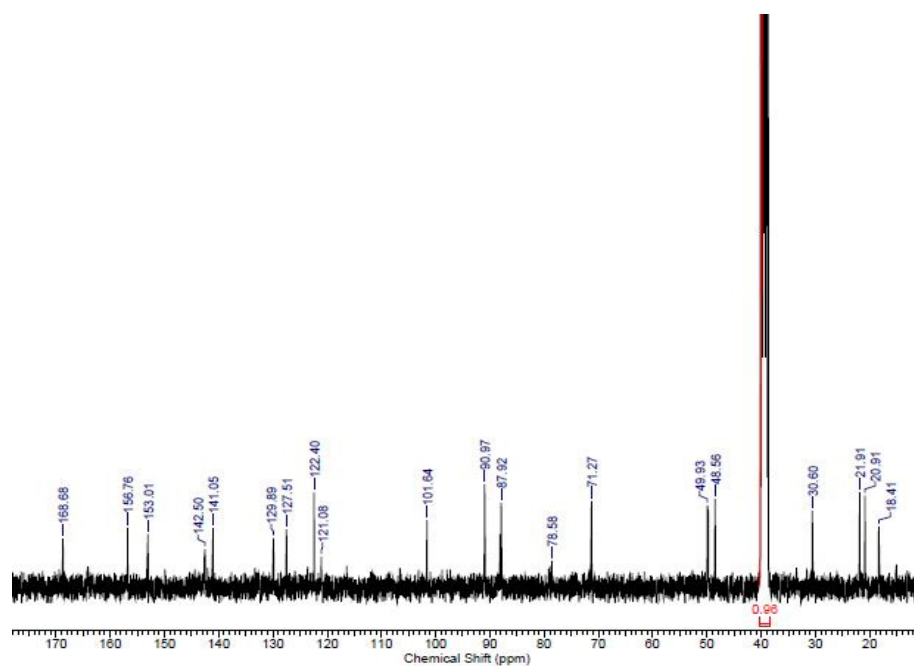

Fig S12:  $^{13}\text{C}$  NMR of Complex 6



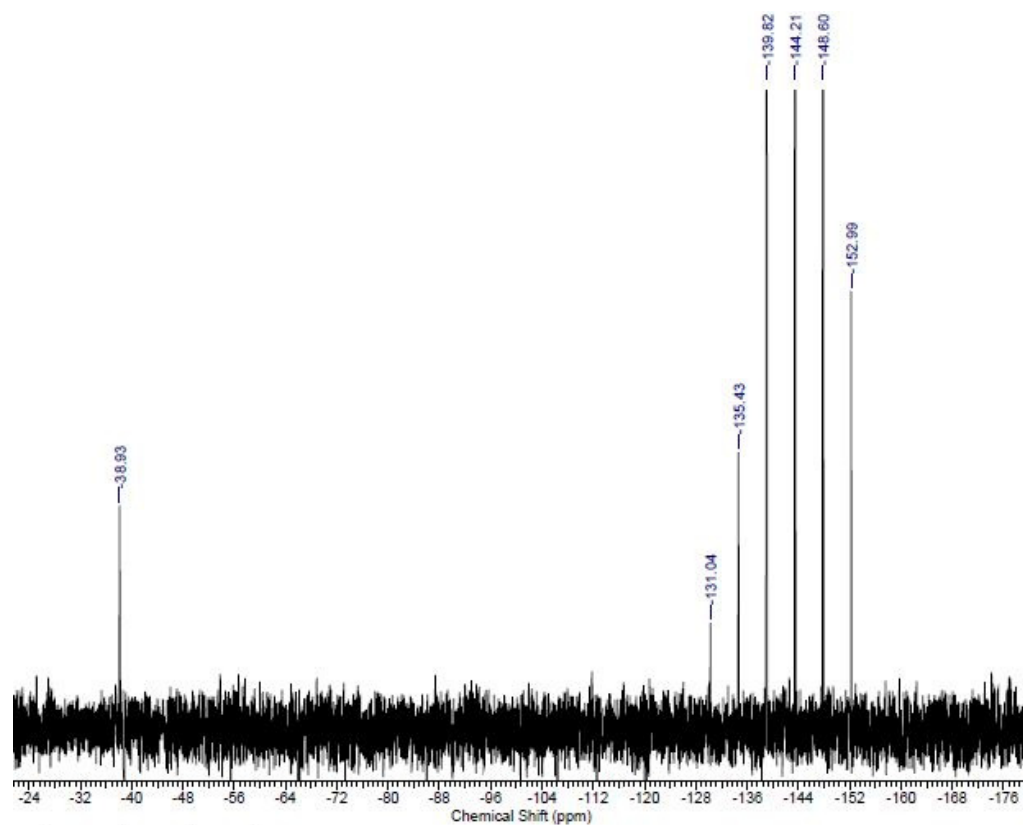

Fig S13:  $^{31}\text{P}$  NMR of Complex **6**

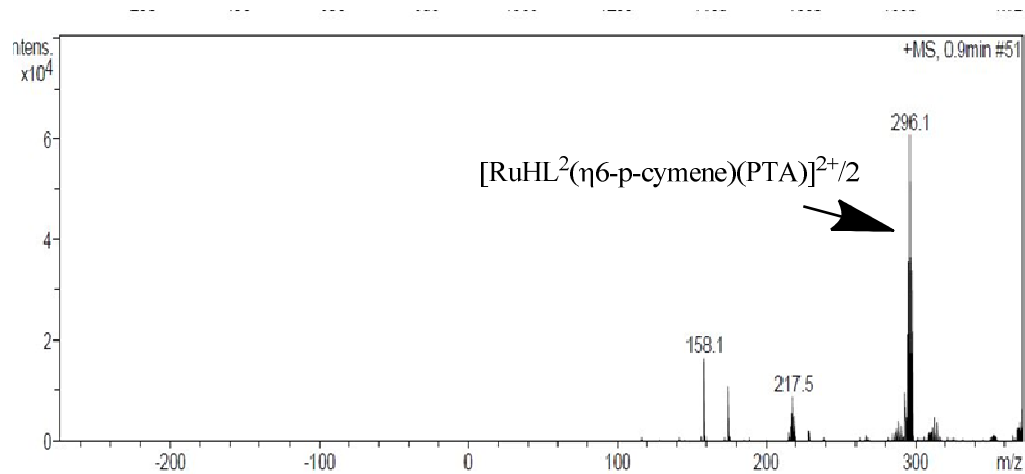

Fig S14: ESI-MS Spectra of Complex **6**  $[\text{RuHL}^2(\eta^6\text{-p-cymene})(\text{PTA})]^{2+}/2$

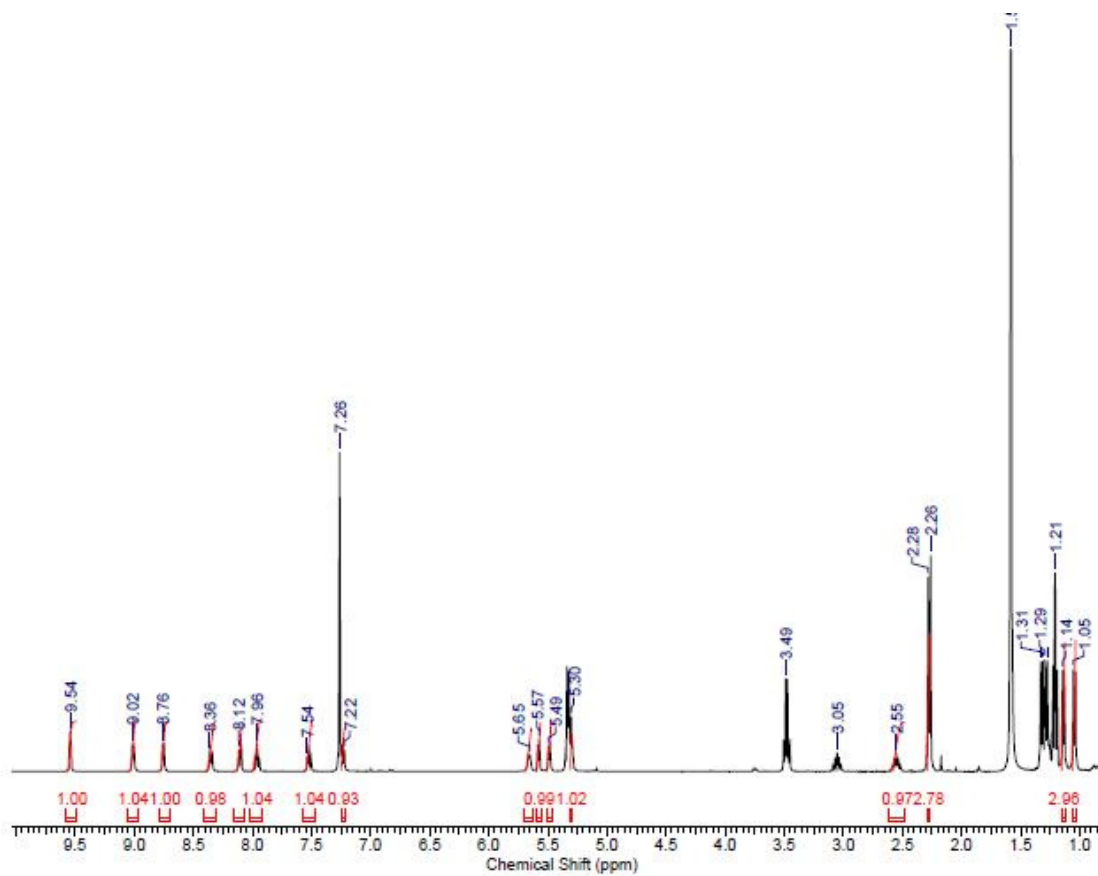

Fig S15:  $^1\text{H}$  NMR of Complex **7**

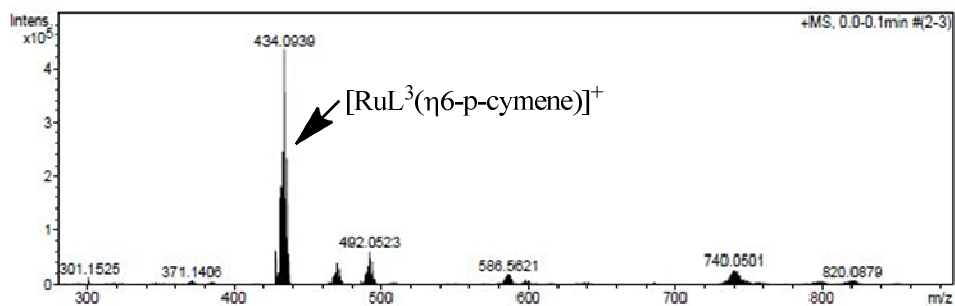

Fig S16: ESI-MS Spectra of Complex **7**  $[\text{RuL}^3(\eta^6\text{-p-cymene})]^+$

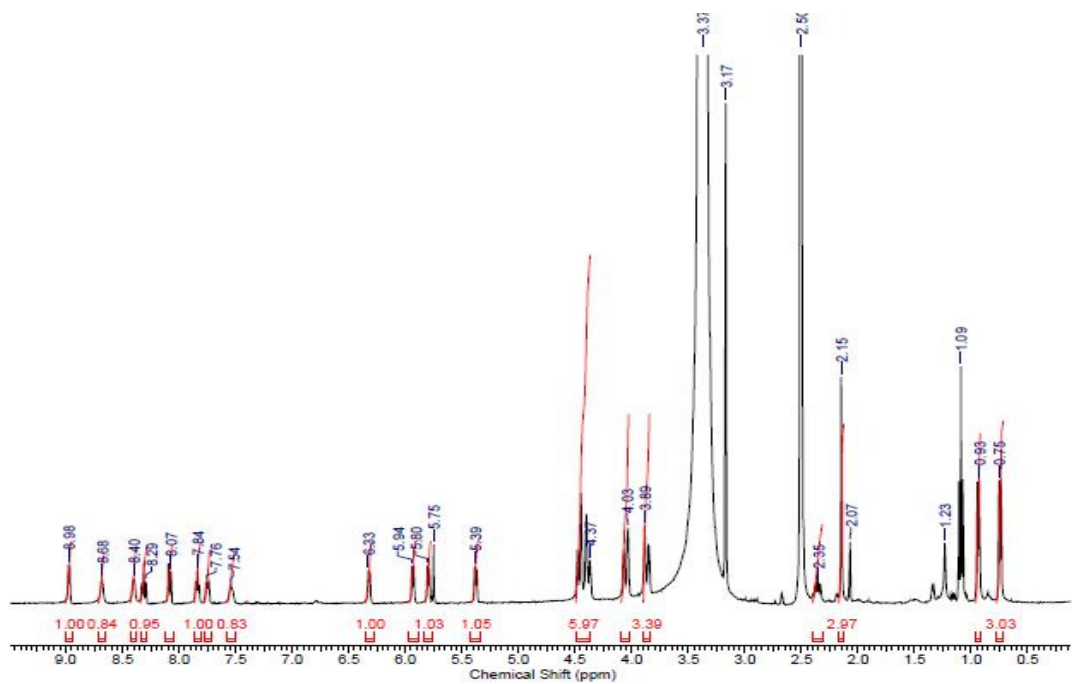

Fig S17:  $^1\text{H}$  NMR of Complex 8

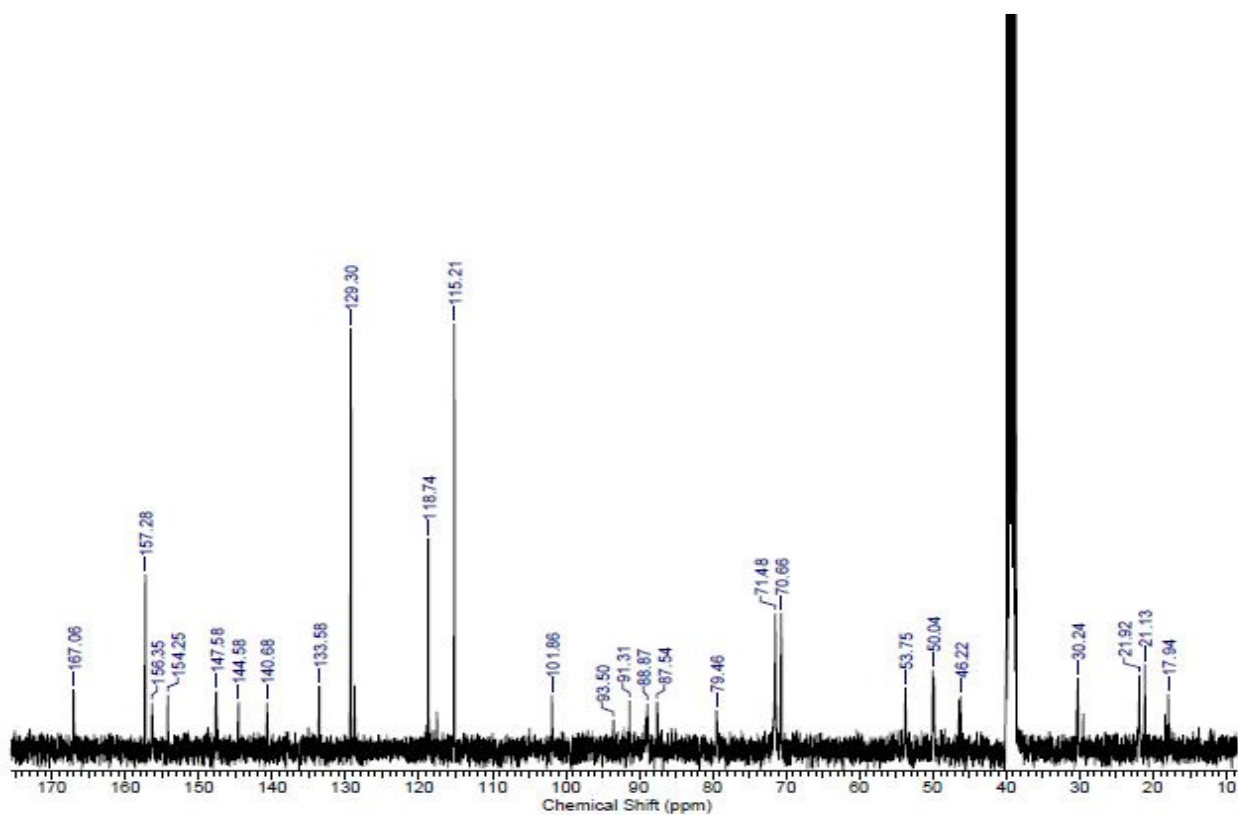

Fig S18:  $^{13}\text{C}$  NMR of Complex 8

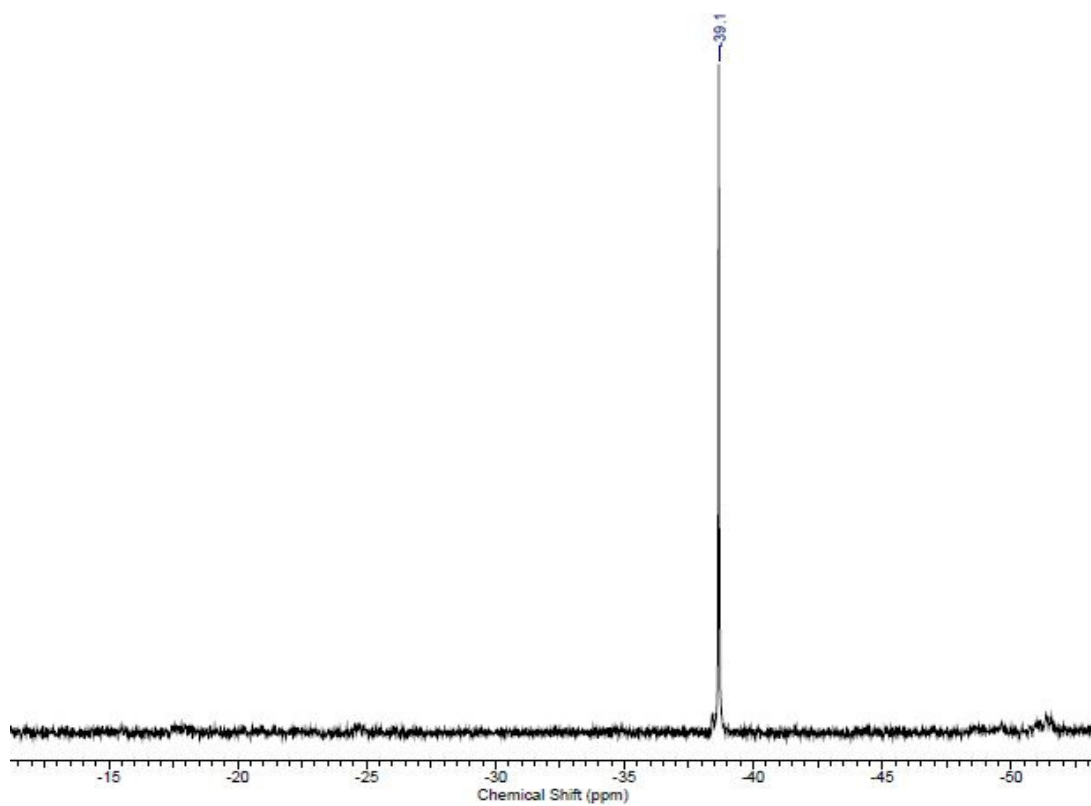

Fig S19:  $^{31}\text{P}$  NMR of Complex **8**

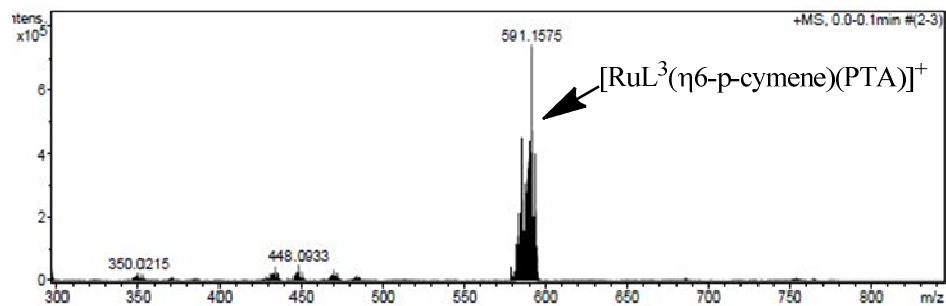

Fig S20: ESI-MS Spectra of Complex **8**  $[\text{RuL}^3(\eta^6\text{-p-cymene})(\text{PTA})]^+$
